# Supplementary material for: Barriers and enablers to implementing antenatal magnesium sulphate for fetal neuroprotection guidelines: a study using the theoretical domains framework
Source: Springer Nature journal article supplement (doi:10.1186/s12884-015-0618-9), 2015-08-17
Supplement: MOESM1 [file 9743326]

**Additional File 1, Table 1:** Summary of clinical recommendations for antenatal magnesium sulphate prior to preterm birth for neuroprotection of the fetus, infant and child

| Clinical Recommendations                                                                                                                                                                                                                                                                                                                                             | Grade <sup>^</sup> | Guideline Chapter |
|----------------------------------------------------------------------------------------------------------------------------------------------------------------------------------------------------------------------------------------------------------------------------------------------------------------------------------------------------------------------|--------------------|-------------------|
| In women at risk of early preterm* imminent# birth, use magnesium sulphate for neuroprotection of the fetus, infant and child:<br>*when gestational age is less than 30 weeks.<br>#when early preterm birth is planned or definitely expected within 24 hours. (When birth is planned, commence magnesium sulphate as close to four hours before birth as possible). | A                  | 4-7               |
|                                                                                                                                                                                                                                                                                                                                                                      | B                  | 8                 |
|                                                                                                                                                                                                                                                                                                                                                                      | A                  | 9                 |
| <ul style="list-style-type: none"> <li>intravenously with a 4 gram loading dose (slowly over 20-30 minutes) and 1 gram per hour maintenance dose via the intravenous route, with no immediate repeat doses. Continue regimen until birth or for 24 hours, whichever comes first.</li> </ul>                                                                          | C                  | 10                |
| <ul style="list-style-type: none"> <li>regardless of plurality (number of babies in utero).</li> </ul>                                                                                                                                                                                                                                                               | B                  | 11                |
| <ul style="list-style-type: none"> <li>regardless of the reason the woman (at less than 30 weeks' gestation) is considered to be at risk of preterm birth.</li> </ul>                                                                                                                                                                                                | B                  | 12                |
| <ul style="list-style-type: none"> <li>regardless of parity (number of previous births for the woman).</li> </ul>                                                                                                                                                                                                                                                    | B                  | 13                |
| <ul style="list-style-type: none"> <li>regardless of anticipated mode of birth.</li> </ul>                                                                                                                                                                                                                                                                           | B                  | 14                |
| <ul style="list-style-type: none"> <li>regardless of whether or not antenatal corticosteroids have been given.</li> </ul>                                                                                                                                                                                                                                            | B                  | 15                |

<sup>^</sup>These grades are based on the Australian National Health and Medical Research Council (NHMRC) standards for grading recommendations for developers of guidelines
